# Supplementary material for: Assessing the Industrial Effluent Effect on Irrigation Water Quality and Farm Soil near Kombolcha Town, Ethiopia
Source: Hindawi journal article supplement (doi:10.1155/2021/5586213), 2021-03-13
Supplement: f1 [file 5586213.f1.zip]

Archive with 2 entries (2 files):
- 5586213.f1/Supplementary Table SI1.docx
- 5586213.f1/Supplementary Table SI2.docx
