# Supplementary material for: Assessing the Industrial Effluent Effect on Irrigation Water Quality and Farm Soil near Kombolcha Town, Ethiopia
Source: Hindawi journal article supplement (doi:10.1155/2021/5586213), 2021-03-13
Supplement: f1 [file 5586213.f1.zip › 5586213.f1/Supplementary Table SI1.docx]

**Supplementary Table SI1: GPS coordinates of the sampling sites**

|  | Upstream Borkena Station (A) | | Downstream Borkena Station (B) | | | |
| --- | --- | --- | --- | --- | --- | --- |
| Water Sample | Soil Sample | Water Samples | Soil Samples | | |
| 1st station | 2ndstation | 3rdstation |
| East | 0578981 | 0579300 | 0580226 | 0588312 | 0588900 | 0589011 |
| North | 1226572 | 1226466 | 123972 | 123840 | 123760 | 123775 |
| Latitude | 1833 | 1826 | 1793 | 1765 | 1767 | 1763 |
