# Supplementary material for: Assessing the Industrial Effluent Effect on Irrigation Water Quality and Farm Soil near Kombolcha Town, Ethiopia
Source: Hindawi journal article supplement (doi:10.1155/2021/5586213), 2021-03-13
Supplement: f1 [file 5586213.f1.zip › 5586213.f1/Supplementary Table SI2.docx]

**Supplementary Table SI2: Summary of water and soil samples in the study area**

| Water Samples | | | | | | | | |  |
| --- | --- | --- | --- | --- | --- | --- | --- | --- | --- |
|  | | Upstream Station  (Control sample) | | Downstream Station | | | | | Total |
| 1st phase | | 2nd phase | | 3rd phase |
|  | | 1* | | 3 | | 3 | | 3 | 10 |
|  | | 1* | | 3 | | 3 | | 3 | 10 |
| Soil Samples | | | | | | | | | |
| Surface Composite | | 1* | 1 | | 1 | | 1 | | 4 |
| Sub Surface | 0-30 cm | 1* | 3 | | 3 | | 3 | | 10 |
| 30-60cm | 1* | 3 | | 3 | | 3 | | 10 |
| 60-90cm | 1* | 3 | | 3 | | 3 | | 10 |
| Total | 4* | 10 | | 10 | | 10 | | 34 |

* Triplicates were taken in one Phase
